# Supplementary material for: Coordination of fullerene C60 and benzonitrile to iron(ii) tetraphenylporphyrin in the FeIITPP·C60·(C6H4Cl2)2·(C6H14)0.5 and FeIITPP·(C6H5CN)2 complexes
Source: Royal Society of Chemistry journal article supplement (doi:10.1039/c2ce25295c), 2012-01-01
Supplement: c2ce25295c.pdf [file c2ce25295c.pdf]

**Supporting information.**

**Table S1.** IR spectra of parent compounds and complex **1**.

|                                                 | <b>C<sub>60</sub></b>          | <b>Fe<sup>II</sup>TPP</b>                                                                                                                    | <b>C<sub>6</sub>H<sub>4</sub>Cl<sub>2</sub></b> | <b>C<sub>6</sub>H<sub>14</sub></b>                                | <b>1</b>                                                                                                                             |
|-------------------------------------------------|--------------------------------|----------------------------------------------------------------------------------------------------------------------------------------------|-------------------------------------------------|-------------------------------------------------------------------|--------------------------------------------------------------------------------------------------------------------------------------|
| <b>C<sub>60</sub></b>                           | 526s<br>576m<br>1182m<br>1429m |                                                                                                                                              |                                                 |                                                                   | 526s<br>578m<br>1181m*<br>1427m                                                                                                      |
| <b>Fe<sup>II</sup>TPP</b>                       |                                | 434w<br>661w<br>703m<br>750m<br>806m<br>995s<br>1002s<br>1070m<br>1175m<br>1200w<br>1336m sp<br>1340m sp<br>1440m<br>1486w<br>1559w<br>1596m |                                                 |                                                                   | -<br>659w*<br>700s<br>748s*<br>799s<br>996m<br>1004s<br>1072m*<br>1181m*<br>1204w<br>-<br>1346m*<br>1440m<br>1489w<br>1560w<br>1598w |
| <b>C<sub>6</sub>H<sub>4</sub>Cl<sub>2</sub></b> |                                |                                                                                                                                              | 657w<br>748s<br>1030m<br>1122m<br>1453m         |                                                                   | 659w*<br>748s*<br>1032m<br>1127w*<br>1455m*                                                                                          |
| <b>C<sub>6</sub>H<sub>14</sub></b>              |                                |                                                                                                                                              |                                                 | 722s<br>758w<br>882m<br>1065m<br>1136m<br>1342m<br>1373s<br>1460s | 716m<br>748s*<br>876w<br>1072m*<br>1127w*<br>1346m*<br>-<br>1465w                                                                    |

w- weak, m- middle, s- strong, sp. – split band

\*- the bands coincide.

### IR-spectra

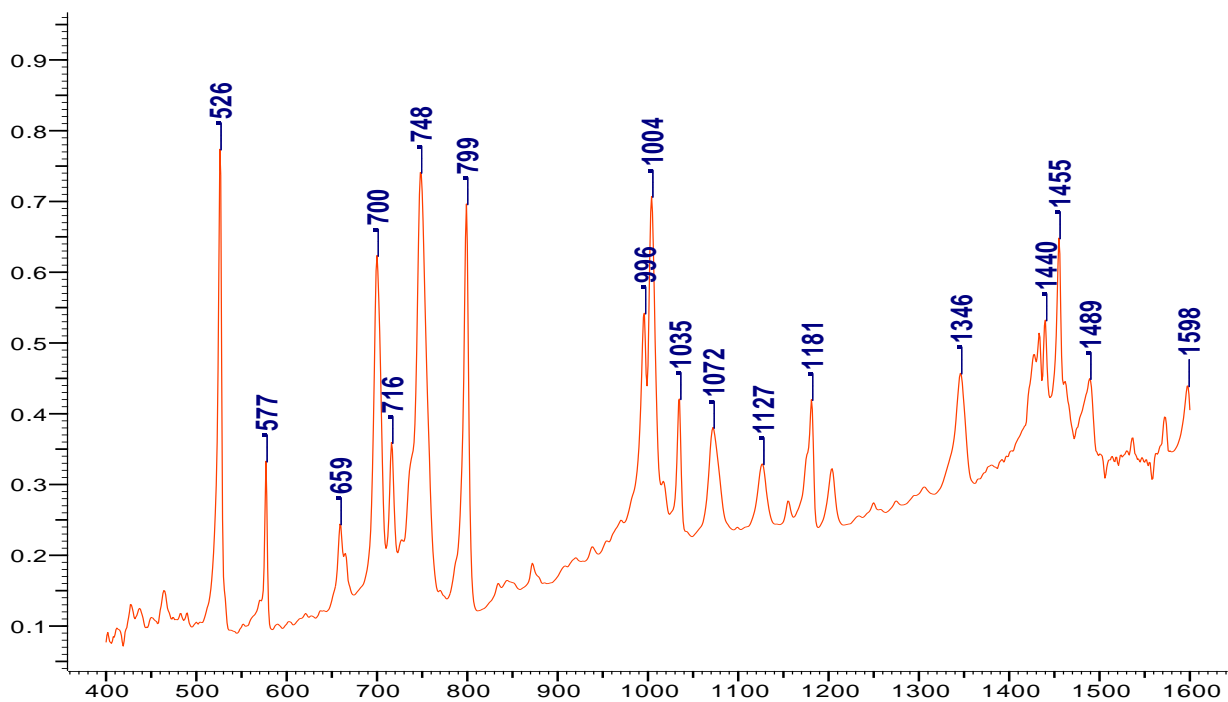

**Figure 1S.** IR-spectrum of **1** in the 400-1600  $\text{cm}^{-1}$  range in KBr pellet.

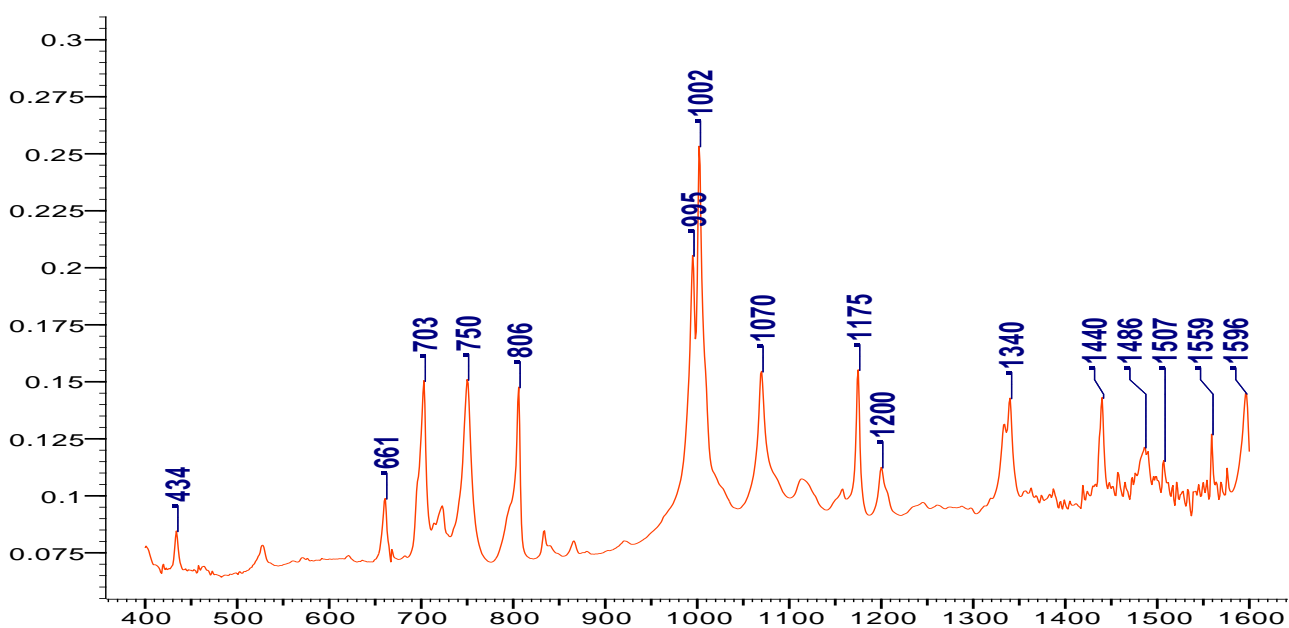

**Figure 2S.** IR-spectrum of  $\text{Fe}^{\text{II}}$ TPP in the 400-1600  $\text{cm}^{-1}$  range in KBr pellet.
